# Supplementary material for: Automated Ultra-Fast 13C NMR Analysis of Polyolefin Materials
Source: PubMed Central journal article supplement (PMC11801656; doi:10.1021/acs.analchem.4c06290), 2025-01-21
Supplement: ac4c06290_si_001.pdf [file ac4c06290_si_001.pdf]

# Supporting Information

## Automated Ultra-Fast $^{13}\text{C}$ NMR Analysis of Polyolefin Materials

Fabio Giampaolo,<sup>†</sup> Roberta Cipullo,<sup>\*,‡</sup> Salvatore Cuomo,<sup>†</sup> Francesco Piccialli,<sup>\*,†</sup> and Vincenzo Busico<sup>‡</sup>

<sup>†</sup>University of Naples Federico II, Department of Mathematics and Applications “R. Caccioppoli”, Italy

<sup>‡</sup>University of Naples Federico II, Department of Chemical Sciences, Italy

Corresponding authors: [rcipullo@unina.it](mailto:rcipullo@unina.it) , [francesco.piccialli@unina.it](mailto:francesco.piccialli@unina.it)

## Table of Content

### **<sup>13</sup>C NMR characterizations of mono-material copolymer samples utilized for FP extraction and FPE construction:**

|                                                                                                                                                                                                                                        |           |
|----------------------------------------------------------------------------------------------------------------------------------------------------------------------------------------------------------------------------------------|-----------|
| Table S1. Library of E/H-LLDPE samples.                                                                                                                                                                                                | <b>S3</b> |
| Table S2. Library of E/H-LLDPE samples prepared and utilized to test the FP matching procedure inside the E/H-LLDPE FPE.                                                                                                               | <b>S3</b> |
| Table S3. Library of E/B-LLDPE samples                                                                                                                                                                                                 | <b>S4</b> |
| Table S4. Library of E/O-LLDPE samples                                                                                                                                                                                                 | <b>S4</b> |
| Table S5. Library of EPR samples                                                                                                                                                                                                       | <b>S5</b> |
| Table S6. Library of raco-PP samples                                                                                                                                                                                                   | <b>S5</b> |
| Table S7. <sup>13</sup> C NMR compositions of E/B-LLDPE, E/O-LLDPE, EPR and raco-PP samples utilized to validate the FP matching procedure with the proper FPE's.                                                                      | <b>S6</b> |
| Figure S1. Correlation plots between conventional and automated <sup>13</sup> C NMR measurements of composition for the E/B-LLDPE (top left), E/O-LLDPE (top right), EPR (bottom left) and raco-PP (bottom right) samples of Table S7. | <b>S7</b> |

**<sup>13</sup>C NMR characterizations of mono-material copolymer samples utilized for FP extraction and FPE construction.**

**Table S1.** Library of E/H-LLDPE samples.

| Sample # | $x(H)$ , mol % | Sample # | $x(H)$ , mol % | Sample # | $x(H)$ , mol % | Sample # | $x(H)$ , mol % |
|----------|----------------|----------|----------------|----------|----------------|----------|----------------|
| E/H-1    | 1.1            | E/H-9    | 3.1            | E/H-17   | 6.3            | E/H-25   | 8.5            |
| E/H-2    | 1.3            | E/H-10   | 3.3            | E/H-18   | 6.5            | E/H-26   | 8.5            |
| E/H-3    | 1.5            | E/H-11   | 3.5            | E/H-19   | 6.8            | E/H-27   | 8.6            |
| E/H-4    | 1.6            | E/H-12   | 3.8            | E/H-20   | 6.9            | E/H-28   | 8.6            |
| E/H-5    | 2.0            | E/H-13   | 4.0            | E/H-21   | 7.7            | E/H-29   | 8.7            |
| E/H-6    | 2.1            | E/H-14   | 4.4            | E/H-22   | 8.0            | E/H-30   | 8.9            |
| E/H-7    | 2.3            | E/H-15   | 5.4            | E/H-23   | 8.2            | E/H-31   | 9.1            |
| E/H-8    | 2.6            | E/H-16   | 5.9            | E/H-24   | 8.4            | E/H-32   | 10.0           |

**Table S2.** Library of E/H-LLDPE samples prepared and utilized to test the FP matching procedure inside the E/H-LLDPE FPE.

| Sample # | $x(H)$ , mol% | Sample # | $x(H)$ , mol% | Sample # | $x(H)$ , mol% |
|----------|---------------|----------|---------------|----------|---------------|
| E/H-T1   | 1.55          | E/H-T11  | 3.4           | E/H-T21  | 6.8           |
| E/H-T2   | 1.55          | E/H-T12  | 3.5           | E/H-T22  | 7.1           |
| E/H-T3   | 1.9           | E/H-T13  | 3.9           | E/H-T23  | 7.3           |
| E/H-T4   | 2.2           | E/H-T14  | 4.1           | E/H-T24  | 7.4           |
| E/H-T5   | 2.9           | E/H-T15  | 4.8           | E/H-T25  | 7.5           |
| E/H-T6   | 3.0           | E/H-T16  | 5.1           | E/H-T26  | 7.7           |
| E/H-T7   | 3.0           | E/H-T17  | 5.3           | E/H-T27  | 8.1           |
| E/H-T8   | 3.1           | E/H-T18  | 5.5           | E/H-T28  | 8.4           |
| E/H-T9   | 3.1           | E/H-T19  | 5.6           | E/H-T29  | 8.5           |
| E/H-T10  | 3.3           | E/H-T20  | 6.4           | E/H-T30  | 9.1           |

**Table S3.** Library of E/B-LLDPE samples

| Sample # | x(B), mol% | Sample # | x(B), mol% | Sample # | x(B), mol% |
|----------|------------|----------|------------|----------|------------|
| EB-1     | 0.6        | EB-12    | 1.9        | EB-23    | 6.6        |
| EB-2     | 0.8        | EB-13    | 2.4        | EB-24    | 6.7        |
| EB-3     | 0.9        | EB-14    | 2.4        | EB-25    | 7.5        |
| EB-4     | 1.0        | EB-15    | 2.5        | EB-26    | 8.2        |
| EB-5     | 1.1        | EB-16    | 3.0        | EB-27    | 8.5        |
| EB-6     | 1.2        | EB-17    | 3.1        | EB-28    | 8.8        |
| EB-7     | 1.2        | EB-18    | 3.2        | EB-29    | 9.0        |
| EB-8     | 1.2        | EB-19    | 3.4        | EB-30    | 9.0        |
| EB-9     | 1.4        | EB-20    | 3.8        | EB-31    | 9.1        |
| EB-10    | 1.4        | EB-21    | 5.1        | EB-32    | 9.2        |
| EB-11    | 1.5        | EB-22    | 6.5        | EB-33    | 10.2       |

**Table S4.** Library of E/O-LLDPE samples

| Sample # | x(O), mol% | Sample # | x(O), mol% | Sample # | x(O), mol% |
|----------|------------|----------|------------|----------|------------|
| EO-1     | 0.56       | EO-11    | 3.3        | EO-21    | 5.9        |
| EO-2     | 0.8        | EO-12    | 3.6        | EO-22    | 6.6        |
| EO-3     | 1.2        | EO-13    | 3.9        | EO-23    | 6.6        |
| EO-4     | 1.4        | EO-14    | 4.0        | EO-24    | 6.6        |
| EO-5     | 2.2        | EO-15    | 4.3        | EO-25    | 6.8        |
| EO-6     | 2.2        | EO-16    | 4.7        | EO-26    | 7.1        |
| EO-7     | 2.5        | EO-17    | 4.8        | EO-27    | 7.3        |
| EO-8     | 2.8        | EO-18    | 5.1        | EO-28    | 7.7        |
| EO-9     | 3.0        | EO-19    | 5.6        | EO-29    | 8.8        |
| EO-10    | 3.1        | EO-20    | 5.8        | EO-30    | 9.2        |
|          |            | EO-31    | 9.2        |          |            |

**Table S5.** Library of EPR samples

| Sample # | x(E), mol% | Sample # | x(E), mol% | Sample # | x(E), mol% |
|----------|------------|----------|------------|----------|------------|
| EPR-1    | 29.7       | EPR-11   | 50.5       | EPR-21   | 62.9       |
| EPR-2    | 32.3       | EPR-12   | 51.6       | EPR-22   | 63.7       |
| EPR-3    | 32.5       | EPR-13   | 53.3       | EPR-23   | 64.6       |
| EPR-4    | 34.3       | EPR-14   | 57.2       | EPR-24   | 64.8       |
| EPR-5    | 36.9       | EPR-15   | 57.9       | EPR-25   | 65.0       |
| EPR-6    | 37.1       | EPR-16   | 58.4       | EPR-26   | 65.8       |
| EPR-7    | 38.0       | EPR-17   | 60.2       | EPR-27   | 66.3       |
| EPR-8    | 46.0       | EPR-18   | 60.7       | EPR-28   | 68.9       |
| EPR-9    | 47.3       | EPR-19   | 60.9       | EPR-29   | 69.2       |
| EPR-10   | 48.3       | EPR-20   | 62.1       |          |            |

**Table S6.** Library of raco-PP samples

| Sample #  | x(E), mol% | Sample #     | x(E), mol% | Sample #   | x(E), mol% |
|-----------|------------|--------------|------------|------------|------------|
| raco-PP-1 | 1.8        | raco-PP-PP-9 | 3.0        | raco-PP-18 | 5.0        |
| raco-PP-2 | 2.2        | raco-PP-10   | 3.0        | raco-PP-19 | 5.3        |
| raco-PP-3 | 2.3        | raco-PP-11   | 3.3        | raco-PP-20 | 6.0        |
| raco-PP-4 | 2.5        | raco-PP-12   | 4.0        | raco-PP-21 | 6.6        |
| raco-PP-5 | 2.7        | raco-PP-13   | 4.0        | raco-PP-22 | 6.7        |
| raco-PP-6 | 2.8        | raco-PP-14   | 4.0        | raco-PP-23 | 7.1        |
| raco-PP-7 | 2.9        | raco-PP-15   | 4.5        |            |            |
| raco-PP-8 | 3.0        | raco-PP-16   | 4.5        |            |            |

**Table S7.**  $^{13}\text{C}$  NMR compositions of E/B-LLDPE, E/O-LLDPE, EPR and raco-PP samples utilized to validate the FP matching procedure with the proper FPE's.

|          | <b>E/B-LLDPE</b> | <b>E/O-LLDPE</b> | <b>EPR</b> | <b>raco-PP</b> |
|----------|------------------|------------------|------------|----------------|
| Sample # | x(B), mol%       | x(O), mol%       | x(E), mol% | x(E), mol%     |
| V1       | 1.3              | 1.6              | 29.7       | 2.7            |
| V2       | 1.3              | 1.6              | 36.4       | 2.7            |
| V3       | 1.8              | 1.6              | 36.9       | 2.8            |
| V4       | 2.2              | 1.65             | 37.1       | 2.8            |
| V5       | 2.2              | 1.7              | 37.7       | 2.9            |
| V6       | 2.3              | 2.2              | 38.0       | 3.0            |
| V7       | 2.3              | 2.35             | 39.6       | 3.0            |
| V8       | 2.3              | 2.4              | 44.7       | 3.1            |
| V9       | 2.4              | 3.1              | 44.8       | 3.1            |
| V10      | 2.4              | 3.2              | 44.9       | 3.1            |
| V11      | 2.5              | 3.3              | 45.6       | 3.1            |
| V12      | 2.5              | 3.6              | 47.1       | 3.2            |
| V13      | 2.5              | 3.6              | 47.5       | 3.2            |
| V14      | 2.6              | 3.9              | 50.5       | 3.2            |
| V15      | 2.6              | 4.6              | 51.5       | 3.2            |
| V16      | 2.7              | 4.8              | 53.3       | 3.3            |
| V17      | 2.7              | 5.1              | 56.6       | 3.3            |
| V18      | 2.9              | 5.4              | 57.9       | 3.4            |
| V19      | 3.0              | 5.4              | 58.4       | 3.5            |
| V20      | 3.2              | 5.8              | 60.2       | 3.7            |
| V21      | 3.3              | 5.9              | 60.7       | 3.7            |
| V22      | 3.4              | 6.2              | 60.9       | 4.1            |
| V23      | 3.7              | 6.8              | 62.1       | 4.3            |
| V24      | 4.3              | 7.6              | 62.9       | 4.3            |
| V25      | 4.5              | 7.6              | 64.6       | 4.5            |
| V26      | 4.9              | 7.9              | 64.8       | 4.5            |
| V27      | 6.8              | 9.0              | 65.0       | 4.5            |
| V28      | 7.6              | 9.2              | 65.8       | 4.6            |
| V29      | 3.0              | 9.2              | 68.9       | 4.6            |
| V30      | 3.0              | 9.2              | 69.2       | 4.8            |

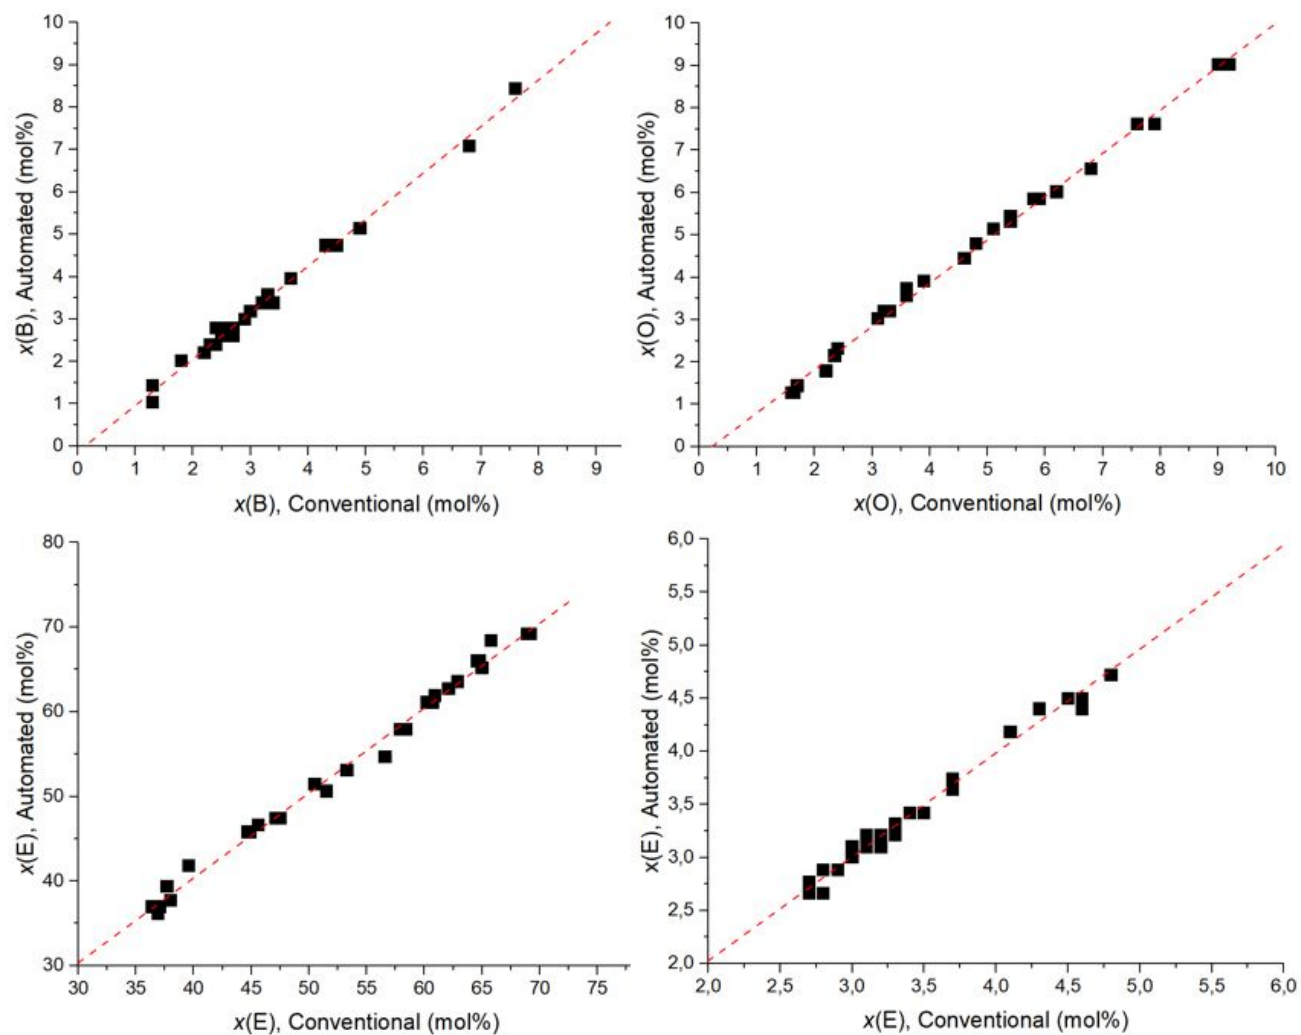

**Figure S1.** Correlation plots between conventional and automated <sup>13</sup>C NMR measurements of composition for the E/B-LLDPE (top left), E/O-LLDPE (top right), EPR (bottom left) and raco-PP (bottom right) samples of Table S7.
